# Supplementary material for: Plasma-etched Ti2O3with oxygen vacancies for enhanced NH3electrosynthesis and Zn–N2batteries
Source: Royal Society of Chemistry journal article supplement (doi:10.1039/d2qi01173e), 2022-01-01
Supplement: d2qi01173e1.pdf [file d2qi01173e1.pdf]

## Electronic Supplementary Information

### Experimental section

**Materials:**  $\text{Ti}_2\text{O}_3$  (100 mesh, 99.9%) was purchased from Sigma-Aldrich. Hydrochloric acid (HCl, 36.0-38.0%), ammonium chloride ( $\text{NH}_4\text{Cl}$ , 99.5%), sodium hypochlorite ( $\text{NaClO}$ , AR), sodium hydroxide ( $\text{NaOH}$ , AR), salicylic acid ( $\text{C}_7\text{H}_6\text{O}_3$ , AR), sodium citrate dihydrate ( $\text{C}_6\text{H}_5\text{Na}_3\text{O}_7 \cdot 2\text{H}_2\text{O}$ , AR), sodium nitroferricyanide (III) dihydrate ( $\text{Na}_2\text{Fe}(\text{CN})_5\text{NO} \cdot 2\text{H}_2\text{O}$ , 99.0%), para-(dimethylamino) benzaldehyde ( $\text{C}_9\text{H}_{11}\text{NO}$ , 99.0%), and Nafion solution (5 wt%) were purchased from Aladdin Reagent Co., Ltd. Absolute ethanol ( $\text{C}_2\text{H}_5\text{OH}$ , 99.7%) and hydrazine hydrate ( $\text{N}_2\text{H}_4 \cdot \text{H}_2\text{O}$ , AR) were purchased from Beijing Chemical Corporation. Carbon paper was bought from Taiwan CeTech Company. The deionized water used throughout all experiments was purified by a Millipore system. All reagents were analytical reagent grade without further purification.

**Preparation of OV- $\text{Ti}_2\text{O}_3$ :** Plasma treatment was performed on an AX-1000II plasma system with a radio frequency power generator (13.56 MHz) at room temperature.  $\text{Ti}_2\text{O}_3$  particles were treated by Ar plasma for 300 s at a radiofrequency power of 600 W and a pressure of 20 Pa in Ar atmosphere (20 sccm) to obtain OV- $\text{Ti}_2\text{O}_3$ .

**Preparation of OV- $\text{Ti}_2\text{O}_3$ /CP and pristine  $\text{Ti}_2\text{O}_3$ /CP:** Typically, 10 mg of catalyst and 40  $\mu\text{L}$  of the 5 wt% Nafion solution were dispersed in 720  $\mu\text{L}$  of absolute ethanol and 240  $\mu\text{L}$  of deionized water and ultrasonicated for 1 h to form a homogeneous ink.

Then 10  $\mu\text{L}$  of ink was loaded onto a 1  $\text{cm}^2$  pretreated carbon paper (CP) and dried under infrared light for measurement.

**Characterizations:** X-ray powder diffraction (XRD) patterns were collected on a Shimadzu XRD-6100 diffractometer (Shimadzu, Japan) with a  $\text{Cu K}\alpha$  X-ray source. SEM images and corresponding EDX elemental mapping images were obtained from a GeminiSEM 300 field-emission scanning electron microscope (ZEISS, Germany) with an accelerating voltage of 5 kV. TEM and HRTEM images were performed on a Zeiss Libra 200FE transmission electron microscope at 200 kV. Raman spectra were obtained using a LabRAM HR Evolution Raman spectrometer. Electron paramagnetic resonance (EPR) measurements were conducted on a Bruker 500 spectrometer at 298 K. X-ray photoelectron spectroscopy (XPS) measurements were carried out on an ESCALAB 250Xi spectrometer equipped with monochromatized  $\text{Al K}\alpha$  radiation. Absorbance data were acquired on a Shimadzu UV-1800 UV-vis spectrophotometer. Ion chromatography (IC) data were obtained by using a ThermoFisher ICS 5000 plus IC. Gaseous products were detected by a Shimadzu GC-2014 gas chromatograph (GC) with thermal conductivity detector.

**Electrochemical measurements:**  $\text{N}_2$  reduction experiments were carried out in a gastight H-type electrolytic cell separated by a Nafion 211 membrane under ambient conditions. The Nafion membrane was pretreated by heating in 3%  $\text{H}_2\text{O}_2$  solution and 0.5 M  $\text{H}_2\text{SO}_4$  at 80  $^\circ\text{C}$  for 1 h, respectively, and then immersed in deionized water for another 1 h. Electrochemical data were collected with a CHI760E electrochemical

workstation (Shanghai, Chenhua). In this work, OV-Ti<sub>2</sub>O<sub>3</sub>/CP, Ag/AgCl/saturated KCl, and graphite rod were used as the working electrode, reference electrode, and counter electrode, respectively. All potentials were converted to the reversible hydrogen electrode (RHE) through calibration ( $E$  (vs RHE) =  $E$  (vs Ag/AgCl) + 0.197 V + 0.059 × pH). Before NRR measurement, the HCl electrolyte was purged with N<sub>2</sub> for 30 min. For the NRR experiments, the chronoamperometry tests were performed in an N<sub>2</sub>-saturated 0.1 M HCl solution (pH=1, 35 mL). During the electrolysis process, high-purity N<sub>2</sub> gas (99.999%) was continuously purged into the cathodic chamber at a flow rate of 20 mL min<sup>-1</sup>.

**Assembly of the Zn-N<sub>2</sub> battery and electrochemical test:** The homemade rechargeable Zn-N<sub>2</sub> battery was assembled with OV-Ti<sub>2</sub>O<sub>3</sub>/CP (1 × 1 cm<sup>2</sup>) electrode as the cathode and a polished Zn plate (1 × 1 cm<sup>2</sup>) as the anode. A typical H-type cell containing 35 mL of cathode electrolyte (0.1 M HCl) and 35 mL of anode electrolyte (1 M KOH) is separated by a bipolar membrane (Nafion 211). N<sub>2</sub> gas was continuously bubbled into the catholyte during electrochemical testing. The discharge polarization curves with a scan rate of 2 mV s<sup>-1</sup> and galvanostatic tests were performed on a CHI760E electrochemical workstation. The power density ( $P$ ) of the Zn-N<sub>2</sub> battery was determined by  $P = I \times V$ , where  $I$  and  $V$  are the discharge current density and voltage, respectively.

The electrochemical reactions in Zn-N<sub>2</sub> battery are as follows:<sup>1-3</sup>

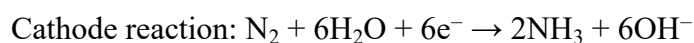

Anode reaction:  $\text{Zn} + 2\text{OH}^- \rightarrow \text{ZnO} + \text{H}_2\text{O} + 2\text{e}^-$

Overall reaction:  $3\text{Zn} + \text{N}_2 + 3\text{H}_2\text{O} \rightarrow 3\text{ZnO} + 2\text{NH}_3$

**Determination of  $\text{NH}_3$ :** The concentrations of  $\text{NH}_3$  produced were detected by the indophenol blue method using a UV-vis spectrophotometer. Firstly, 2 mL of electrolyte was pipetted from the cathodic chamber and mixed with 2 mL of 1 M NaOH solution containing 5%  $\text{C}_7\text{H}_6\text{O}_3$  and 5%  $\text{C}_6\text{H}_5\text{Na}_3\text{O}_7 \cdot 2\text{H}_2\text{O}$ . Then, 1 mL of 0.05 M NaClO and 0.2 mL of 1%  $\text{Na}_2\text{Fe}(\text{CN})_5\text{NO} \cdot 2\text{H}_2\text{O}$  were added to the above solution in turn. Finally, after standing for 120 min at room temperature, the absorbance measurements were performed in the range of 500 nm to 800 nm. The concentration-absorbance (at 655 nm) curves were calibrated by measuring a series of standard solutions with different  $\text{NH}_4\text{Cl}$  concentrations. The fitting curve of  $\text{NH}_3$  ( $y = 0.3848x + 0.036$ ,  $R^2 = 0.999$ ) shows a good linear relationship between absorbance value and  $\text{NH}_4^+$  concentration.

**Determination of  $\text{N}_2\text{H}_4$ :** The concentration of  $\text{N}_2\text{H}_4$  was determined by Watt and Chrisp method. 5.99 g of p- $\text{C}_9\text{H}_{11}\text{NO}$ , 30 mL of concentrated HCl, and 300 mL of  $\text{C}_2\text{H}_5\text{OH}$  were homogeneously mixed as a color reagent. Typically, 2 mL of electrolyte was removed from the cathodic chamber and mixed with 2 mL of the above-prepared color reagent. After standing for 10 min at room temperature, the UV-vis absorption spectra were collected at a wavelength of 455 nm. The fitting curve of  $\text{N}_2\text{H}_4$  ( $y = 0.389x + 0.041$ ,  $R^2 = 0.999$ ) shows a good linear relationship between absorbance value with  $\text{N}_2\text{H}_4$  concentration.

### Calculations of NH<sub>3</sub> yield and Faradaic efficiency (FE):

NH<sub>3</sub> yield ( $V_{\text{NH}_3}$ ) was calculated using the following equation:

$$V_{\text{NH}_3} = c(\text{NH}_3) \times V / (t \times m_{\text{cat.}}) \quad (1)$$

FE was calculated by the following equation:

$$\text{FE}_{\text{NH}_3} = 3F \times c(\text{NH}_3) \times V / (17 \times Q) \times 100\% \quad (2)$$

where  $c(\text{NH}_3)$  is the measured NH<sub>3</sub> concentration,  $V$  is the volume of the electrolyte in the cathodic chamber (35 mL),  $t$  is the electrolysis time (2 h),  $m_{\text{cat.}}$  is the mass loading of the catalyst on CP (0.1 mg),  $F$  is the Faraday constant (96485 C mol<sup>-1</sup>), and  $Q$  is the total charge passed through the electrode.

### Calculation of FE for H<sub>2</sub>:

FE for H<sub>2</sub> was calculated using the following equation:

$$\text{FE}_{\text{H}_2} = 2F \times n(\text{H}_2) / Q \times 100\% \quad (3)$$

### Calculations of electrochemical active surface area (ECSA) and turnover

**frequency (TOF):** The ECSA of the electrode was determined by the electrochemical double-layer capacitance ( $C_{\text{dl}}$ ). We tested the cyclic voltammetry curves of OV-Ti<sub>2</sub>O<sub>3</sub> and pristine Ti<sub>2</sub>O<sub>3</sub> at scanning rates of 20, 40, 60, 80, 100, 120, 140, and 160 mV s<sup>-1</sup> to calculate the  $C_{\text{dl}}$  value. Moreover, the specific capacitance ( $C_s$ ) for a flat surface is generally found to be in the range of 20~60 μF cm<sup>-2</sup>. The ECSA was calculated by dividing the  $C_{\text{dl}}$  with the specific capacitance ( $C_s = 60 \mu\text{F cm}^{-2}$ ) of flat electrodes in 0.1 M HCl.<sup>4,5</sup>

$$A_{\text{ECSA}} = C_{\text{dl}} / C_s \quad (4)$$

The TOF value of the electrocatalyst was calculated by the following equation:<sup>6</sup>

$$\text{TOF} = V_{\text{NH}_3} \times m_{\text{cat.}} \times N_{\text{A}} / 17 \times \text{surface sites} \times A_{\text{ECSA}} \quad (5)$$

where  $N_{\text{A}}$  is Avogadro constant ( $6.023 \times 10^{23} \text{ mol}^{-1}$ ). Since the exact nitrogen binding site is unknown, we conservatively estimate the number of active sites as the total number of surface sites. Surface Ti ions of  $\text{Ti}_2\text{O}_3$  are considered to be catalytic active species (two Ti atoms and three O atoms with a volume of  $313.5 \text{ \AA}^3$ ).

Surface sites per real surface area:<sup>7,8</sup>

$$\text{Surface sites} = \left( \frac{\text{Atoms per unit cell}}{\text{Volume/unit cell}} \right)^{\frac{2}{3}} = \left( \frac{5 \text{ Atoms/unit cell}}{313.5 \text{ \AA}^3/\text{unit cell}} \right)^{\frac{2}{3}} \quad (6)$$

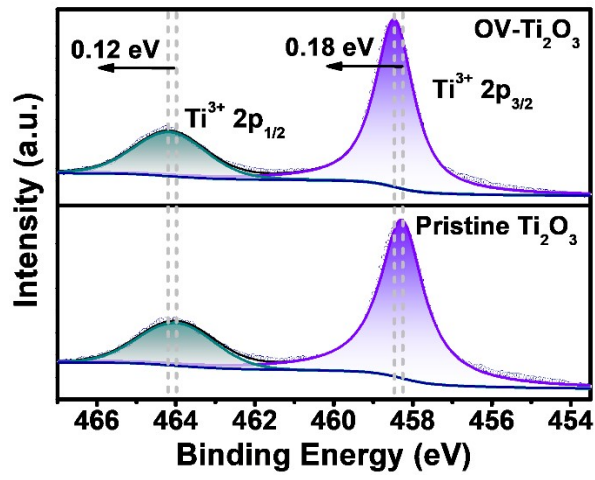

**Fig. S1.** XPS spectra of pristine Ti<sub>2</sub>O<sub>3</sub> and OV-Ti<sub>2</sub>O<sub>3</sub> in the Ti 2p region.

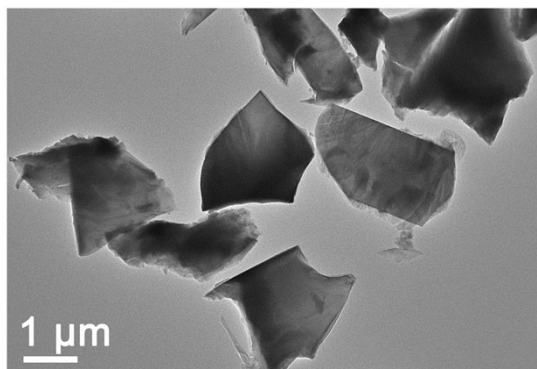

**Fig. S2.** TEM image of OV-Ti<sub>2</sub>O<sub>3</sub>.



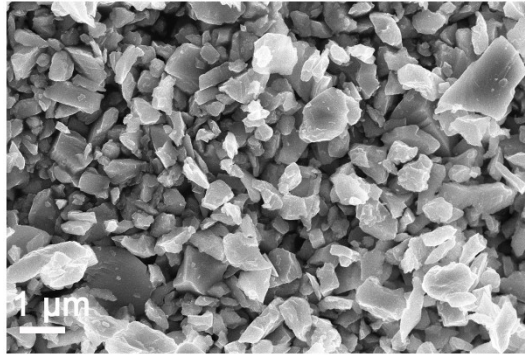

**Fig. S3.** SEM image of pristine Ti<sub>2</sub>O<sub>3</sub>.

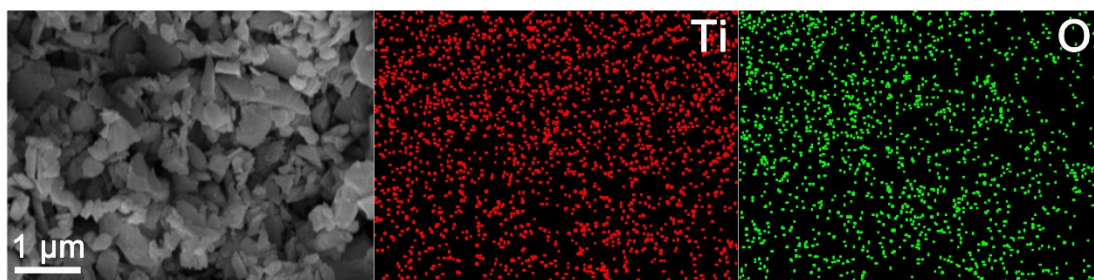

**Fig. S4.** SEM image and corresponding EDX elemental mapping images of OV-Ti<sub>2</sub>O<sub>3</sub>.

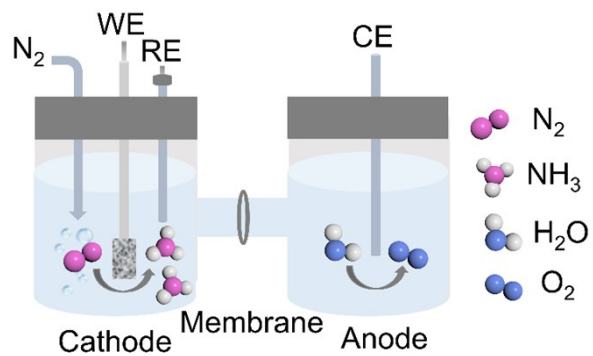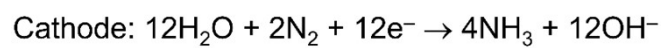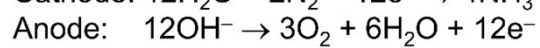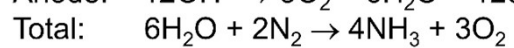

**Fig. S5.** Schematic illustration of the NRR process.

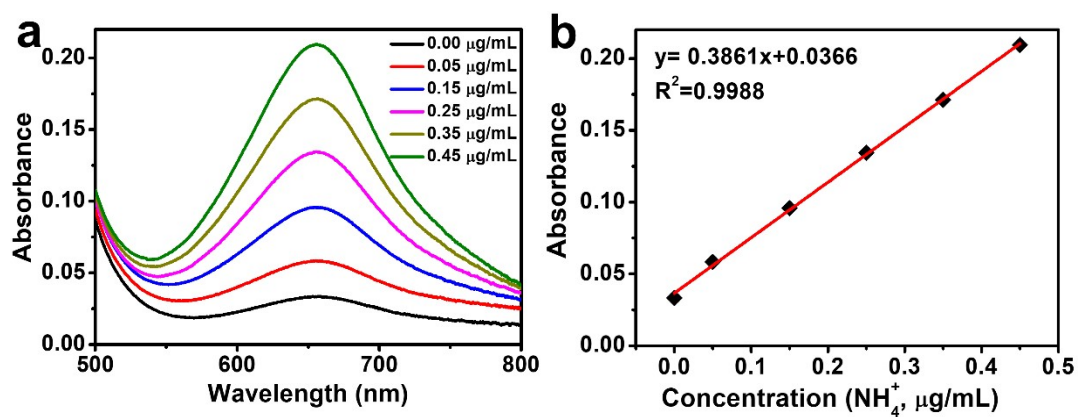

**Fig. S6.** (a) UV-vis absorption spectra of indophenol assays with  $\text{NH}_4^+$  concentrations after incubated for 2 h at room temperature. (b) Calibration curve used for calculation of  $\text{NH}_4^+$  concentrations.

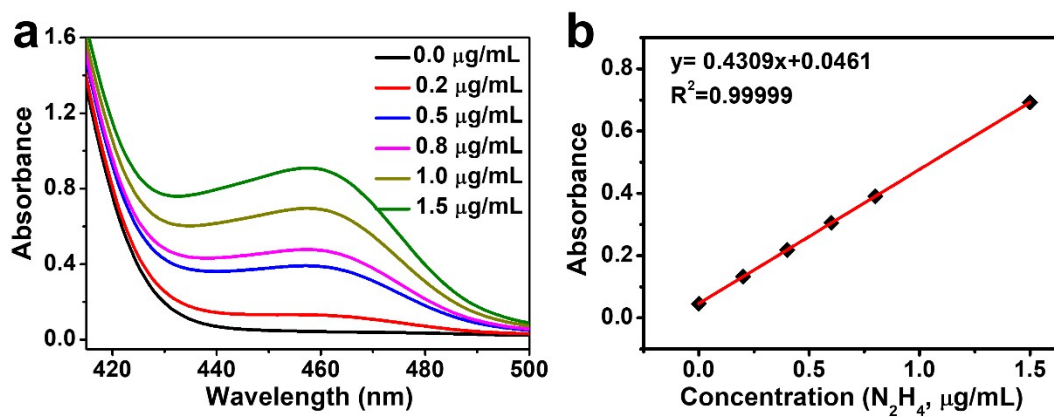

**Fig. S7.** (a) UV-vis absorption spectra of various  $N_2H_4$  concentrations after incubated for 10 min at room temperature. (b) Calibration curve used for calculation of  $N_2H_4$  concentrations.

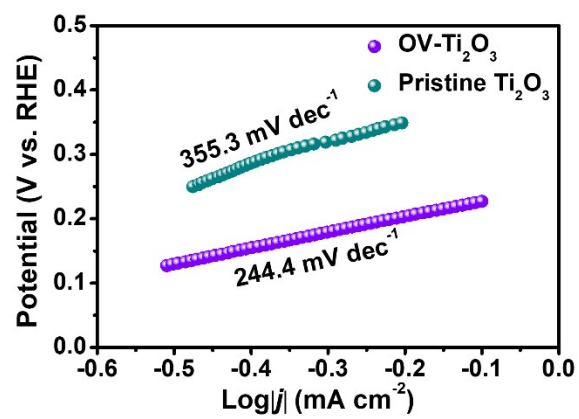

**Fig. S8.** Tafel plots of OV-Ti<sub>2</sub>O<sub>3</sub> and pristine Ti<sub>2</sub>O<sub>3</sub> catalysts for NRR.

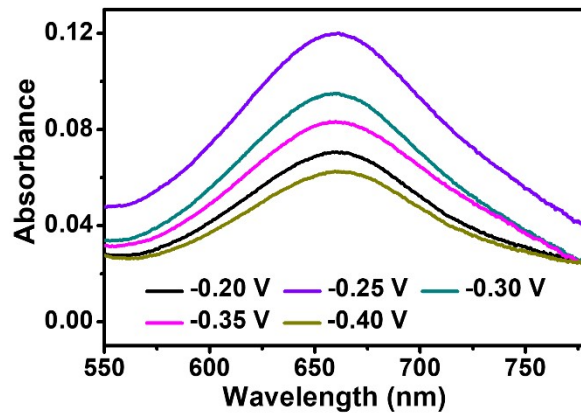

**Fig. S9.** UV-vis absorption spectra of the electrolytes stained with the indophenol indicator for the OV-Ti<sub>2</sub>O<sub>3</sub> electrode at different potentials after NRR electrolysis for 2 h.

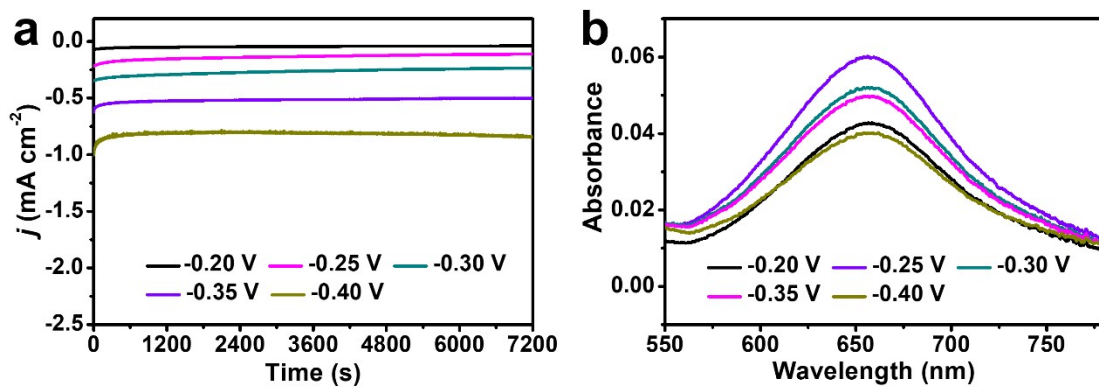

**Fig. S10.** (a) Chronoamperometry curves of pristine  $\text{Ti}_2\text{O}_3$  at different potentials in  $\text{N}_2$ -saturated 0.1 M HCl solution. (b) Corresponding UV-vis absorption spectra of the electrolytes stained with the indophenol indicator after NRR electrolysis for 2 h.



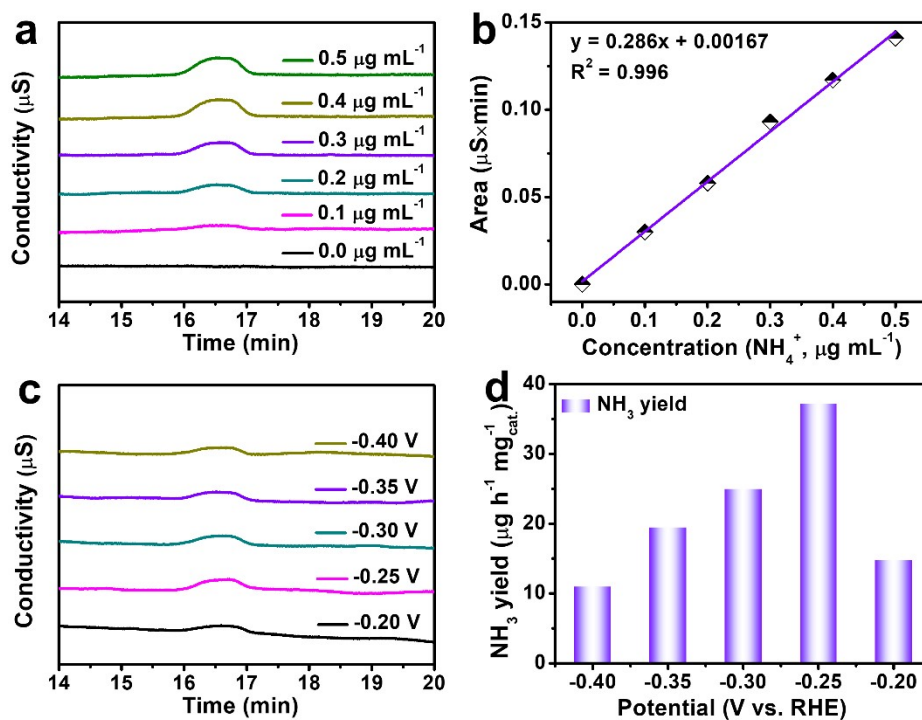

**Fig. S11.** (a) Ion chromatogram curves of the standard solution with  $\text{NH}_4^+$  concentrations in 0.1 M HCl. (b) Calibration curve used for estimation of  $\text{NH}_4^+$ . (c) Ion chromatogram for the electrolytes at a series of potentials after electrolysis for 2 h. (d)  $\text{NH}_3$  yields of OV- $\text{Ti}_2\text{O}_3/\text{CP}$  at corresponding potentials.

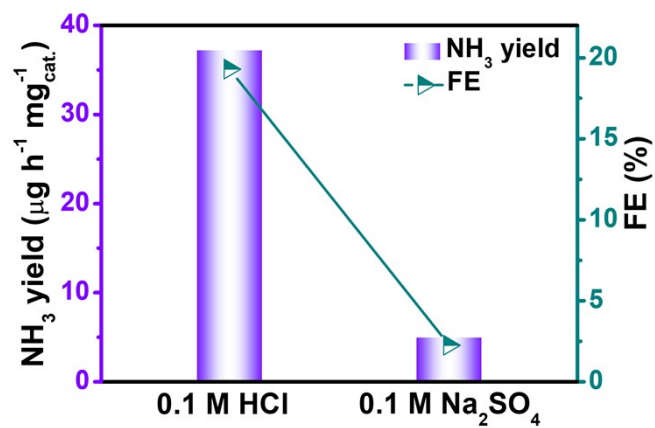

**Fig. S12.** NH<sub>3</sub> yields and FEs of OV-Ti<sub>2</sub>O<sub>3</sub>/CP at -0.25 V in 0.1 M HCl and 0.1 M Na<sub>2</sub>SO<sub>4</sub>.

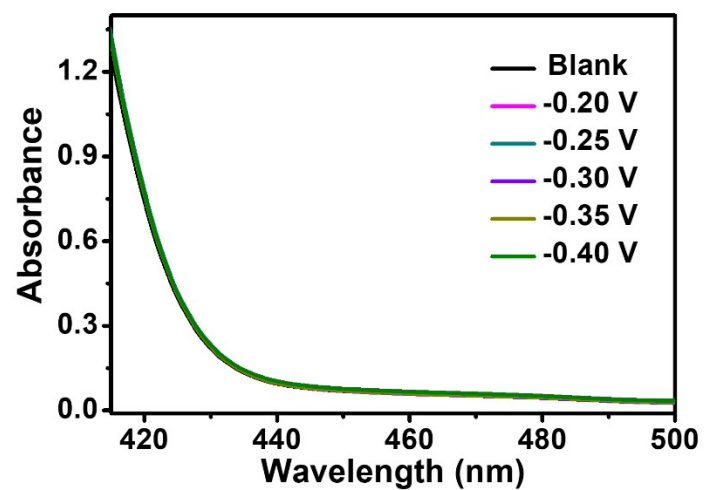

**Fig. S13.** UV-vis absorption spectra of the electrolytes detected by the method of Watt and Chrisp after 2 h electrolysis in  $N_2$  atmosphere at a series of potentials.

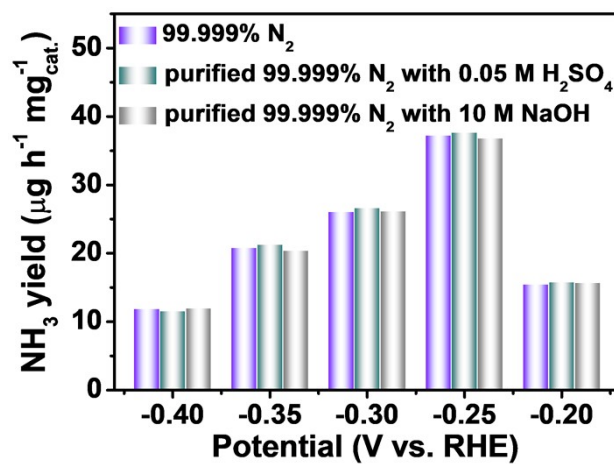

**Fig. S14.** Comparisons of the NH<sub>3</sub> yields at different applied potentials over OV-Ti<sub>2</sub>O<sub>3</sub> using a feed gas of 99.999% N<sub>2</sub>, and purified 99.999% N<sub>2</sub> with 0.05 M H<sub>2</sub>SO<sub>4</sub> or 10 M NaOH.

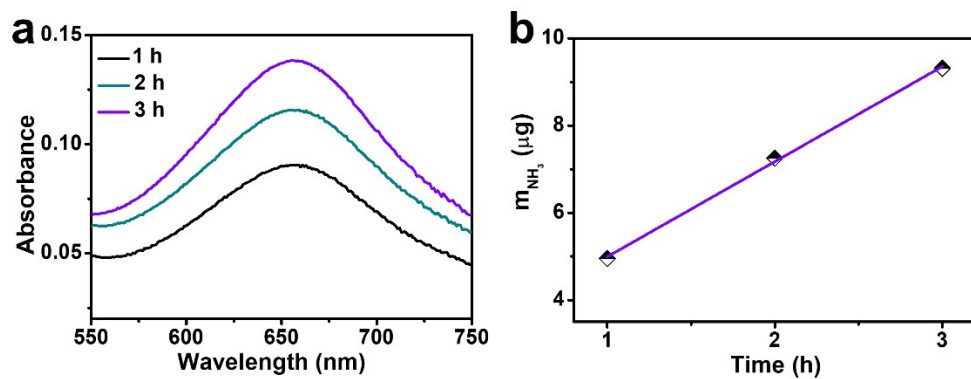

**Fig. S15.** (a) UV-vis spectra of the electrolytes with different electrolysis times at  $-0.25$  V on the OV-Ti<sub>2</sub>O<sub>3</sub> catalyst. (b) The mass of produced NH<sub>3</sub> vs electrolysis time at  $-0.25$  V.

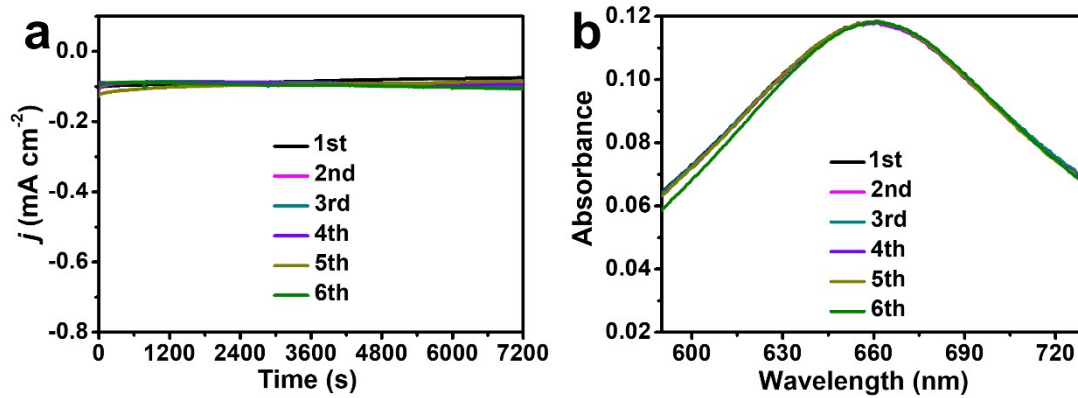

**Fig. S16.** (a) Chronoamperometry curves of OV-Ti<sub>2</sub>O<sub>3</sub>/CP under recycling tests for NRR at -0.25 V in 0.1 M HCl. (b) UV-vis absorption spectra of the electrolytes stained with indophenol indicator after NRR electrolysis.

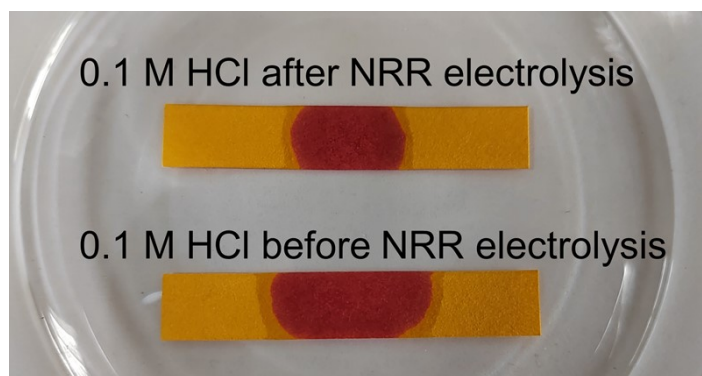

**Fig. S17.** Photographs of pH test strips in 0.1 M HCl before and after 12-h electrolysis.

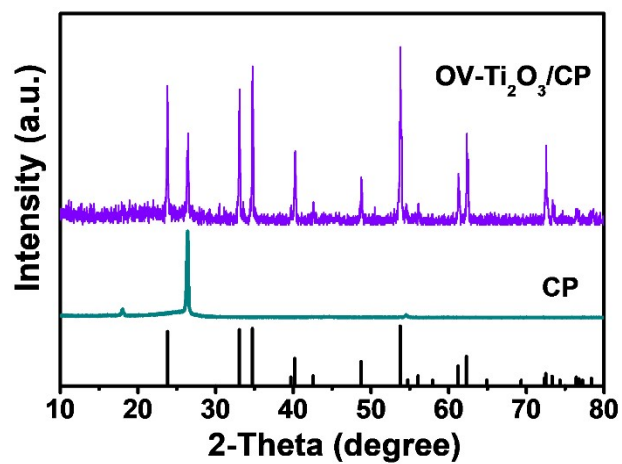

**Fig. S18.** XRD pattern for OV-Ti<sub>2</sub>O<sub>3</sub>/CP after long-term NRR electrolysis.



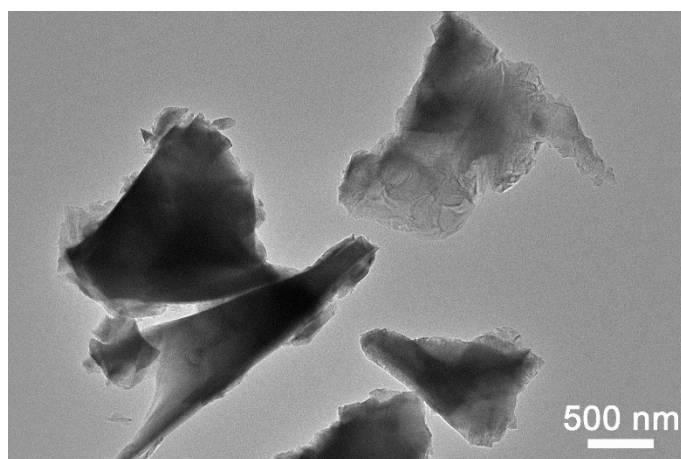

**Fig. S19.** TEM image for OV-Ti<sub>2</sub>O<sub>3</sub>/CP after long-term NRR electrolysis.

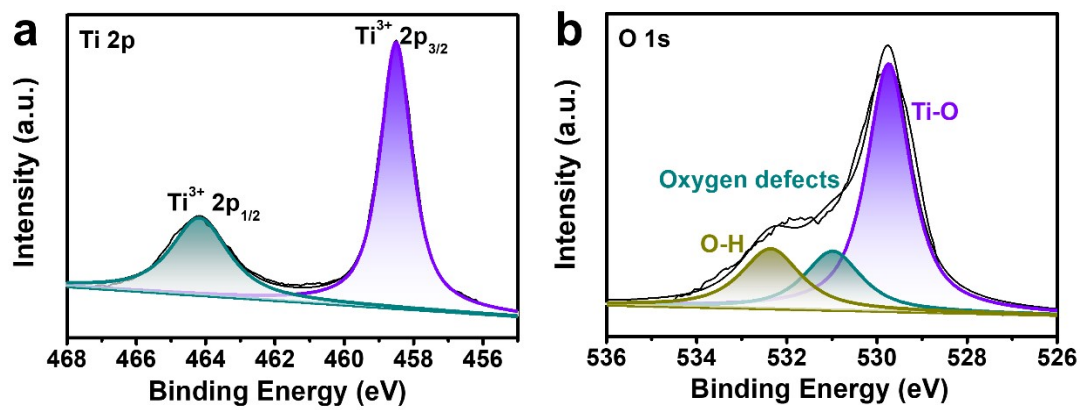

**Fig. S20.** XPS spectra of OV-Ti<sub>2</sub>O<sub>3</sub>/CP after long-term NRR electrolysis.

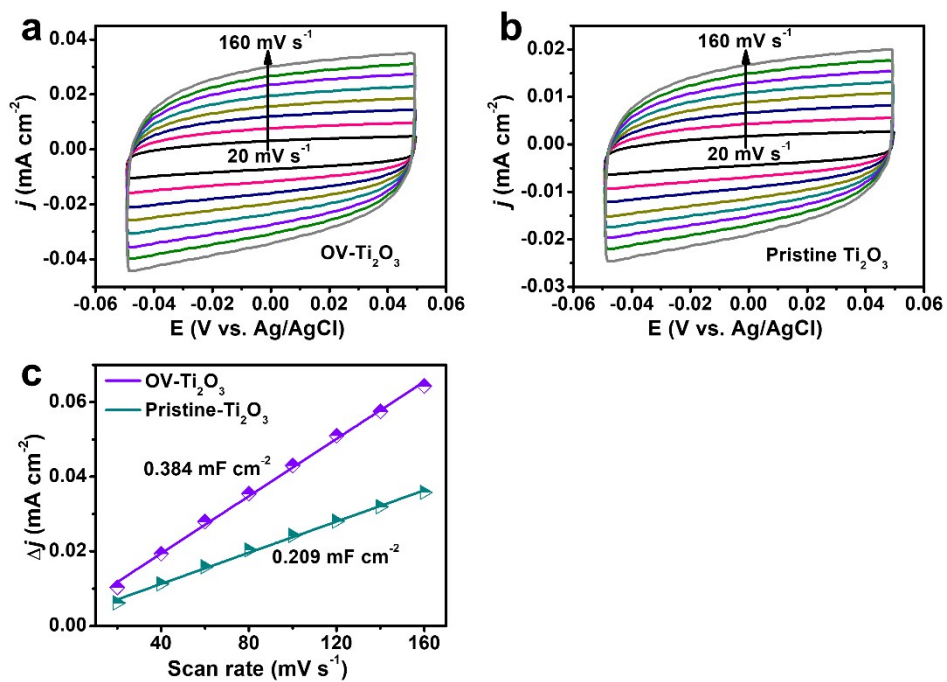

**Fig. S21.** Cyclic voltammetry curves of (a) OV-Ti<sub>2</sub>O<sub>3</sub>/CP, and (b) pristine Ti<sub>2</sub>O<sub>3</sub>/CP with various scan rates (20-160 mV s<sup>-1</sup>) in the region of -0.05 to 0.05 V vs Ag/AgCl. (c) The corresponding double-layer capacitance ( $C_{dl}$ ) of OV-Ti<sub>2</sub>O<sub>3</sub>/CP and pristine Ti<sub>2</sub>O<sub>3</sub>/CP.

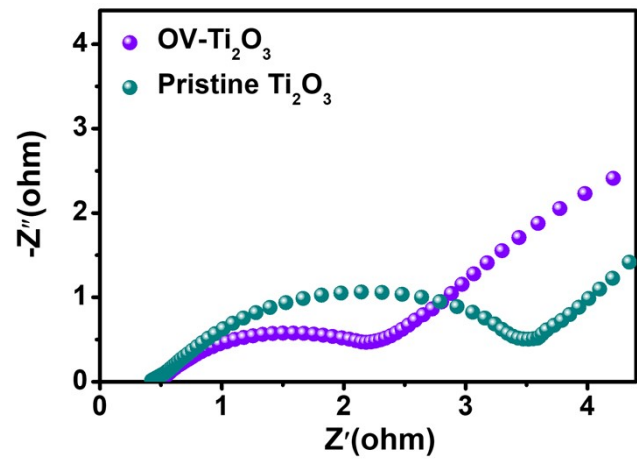

**Fig. S22.** Nyquist plots of OV- $\text{Ti}_2\text{O}_3$  and pristine  $\text{Ti}_2\text{O}_3$ .

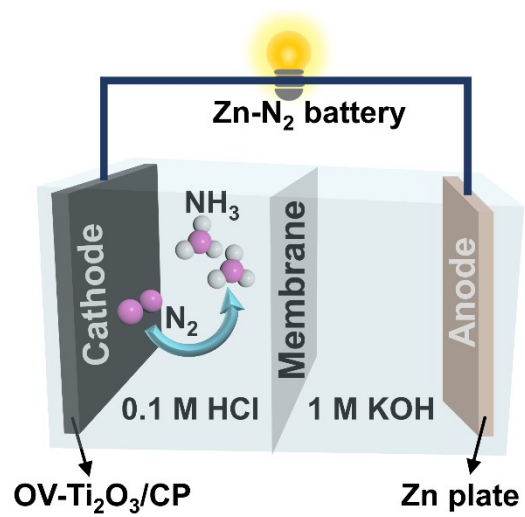

**Fig. S23.** Schematic illustration of Zn-N<sub>2</sub> battery.

**Table S1.** Comparison of the electrocatalytic NRR performances of OV-Ti<sub>2</sub>O<sub>3</sub> with other reported Ti-based catalysts under ambient conditions.

| Catalyst                                 | Electrolyte                            | NH <sub>3</sub> yield                                       | FE (%) | Ref.      |
|------------------------------------------|----------------------------------------|-------------------------------------------------------------|--------|-----------|
| OV-Ti <sub>2</sub> O <sub>3</sub>        | 0.1 M HCl                              | 37.24 μg h <sup>-1</sup> mg <sub>cat.</sub> <sup>-1</sup>   | 19.29  | This work |
| Ti <sub>2</sub> O <sub>3</sub>           | 0.1 M HCl                              | 26.01 μg h <sup>-1</sup> mg <sub>cat.</sub> <sup>-1</sup>   | 9.16   | 9         |
| TiO <sub>2</sub> (V <sub>O</sub> )       | 0.1 M HCl                              | 3.0 μg h <sup>-1</sup> mg <sub>cat.</sub> <sup>-1</sup>     | 6.5    | 10        |
| OV-TiO <sub>2</sub> nanosheets           | 0.005 M H <sub>2</sub> SO <sub>4</sub> | 35.6 μg h <sup>-1</sup> mg <sub>cat.</sub> <sup>-1</sup>    | 5.3    | 11        |
| Ru/TiO <sub>2</sub> -V <sub>O</sub>      | 0.1 M KOH                              | 2.11 μg h <sup>-1</sup> cm <sup>-2</sup>                    | 0.72   | 12        |
| Pd-Co/TiO <sub>2</sub> -V <sub>O</sub>   | 0.1 M KOH                              | 4.11 μg h <sup>-1</sup> cm <sup>-2</sup>                    | 2.83   | 13        |
| Ag@TiO <sub>2</sub>                      | 0.1 M Na <sub>2</sub> SO <sub>4</sub>  | 14.88 μg h <sup>-1</sup> mg <sub>cat.</sub> <sup>-1</sup>   | 6.2    | 14        |
| B-doped TiO <sub>2</sub>                 | 0.1 M Na <sub>2</sub> SO <sub>4</sub>  | 14.4 μg h <sup>-1</sup> mg <sub>cat.</sub> <sup>-1</sup>    | 3.4    | 15        |
| Mn-doped TiO <sub>2</sub>                | 0.1 M Na <sub>2</sub> SO <sub>4</sub>  | 20.05 μg h <sup>-1</sup> mg <sub>cat.</sub> <sup>-1</sup>   | 11.93  | 16        |
| Pd-doped TiO <sub>2</sub>                | 0.1 M Na <sub>2</sub> SO <sub>4</sub>  | 17.4 μg h <sup>-1</sup> mg <sub>cat.</sub> <sup>-1</sup>    | 12.7   | 17        |
| TiO <sub>2</sub> /JE-CMTs                | 0.1 M Na <sub>2</sub> SO <sub>4</sub>  | 20.03 μg h <sup>-1</sup> mg <sub>cat.</sub> <sup>-1</sup>   | 10.76  | 18        |
| V-doped TiO <sub>2</sub>                 | 0.5 M LiClO <sub>4</sub>               | 17.73 μg h <sup>-1</sup> mg <sub>cat.</sub> <sup>-1</sup>   | 15.3   | 19        |
| TiO <sub>2</sub> /Ti                     | 0.1 M Na <sub>2</sub> SO <sub>4</sub>  | 5.6 μg h <sup>-1</sup> mg <sub>cat.</sub> <sup>-1</sup>     | 2.5    | 20        |
| Ti <sup>3+</sup> -TiO <sub>2-x</sub> /TM | 0.1 M Na <sub>2</sub> SO <sub>4</sub>  | 3.51×10 <sup>-10</sup> mol s <sup>-1</sup> cm <sup>-2</sup> | 14.62  | 21        |
| d-TiO <sub>2</sub> /TM                   | 0.1 M HCl                              | 7.58 μg h <sup>-1</sup> mg <sub>cat.</sub> <sup>-1</sup>    | 9.17   | 22        |
| C-Ti <sub>x</sub> O <sub>y</sub> /C      | 0.1 M Li <sub>2</sub> SO <sub>4</sub>  | 14.8 μg h <sup>-1</sup> mg <sub>cat.</sub> <sup>-1</sup>    | 17.8   | 23        |
| TiC/C NF                                 | 0.1 M HCl                              | 14.1 μg h <sup>-1</sup> mg <sub>cat.</sub> <sup>-1</sup>    | 5.8    | 24        |
| Zr-doped TiO <sub>2</sub>                | 1.0 M KOH                              | 8.9 μg h <sup>-1</sup> cm <sup>-2</sup>                     | 17.3   | 25        |
| La-doped TiO <sub>2</sub>                | 0.1 M LiClO <sub>4</sub>               | 23.06 μg h <sup>-1</sup> mg <sub>cat.</sub> <sup>-1</sup>   | 14.54  | 26        |

**Table S2.** Comparison of NH<sub>3</sub> yield and power density of our battery with the reported Zn-N<sub>2</sub> battery systems.

| Battery systems   | Catalysts                         | Power density               | NH <sub>3</sub> yield                                     | Ref.      |
|-------------------|-----------------------------------|-----------------------------|-----------------------------------------------------------|-----------|
| Zn-N <sub>2</sub> | OV-Ti <sub>2</sub> O <sub>3</sub> | 1.02 mW cm <sup>-2</sup>    | 4.3 μg h <sup>-1</sup> mg <sub>cat.</sub> <sup>-1</sup>   | This work |
| Zn-N <sub>2</sub> | CoPi/HSNPC                        | 0.33 mW cm <sup>-2</sup>    | 11.58 μg h <sup>-1</sup> mg <sub>cat.</sub> <sup>-1</sup> | 1         |
| Zn-N <sub>2</sub> | CoPi/NPCS                         | 0.49 mW cm <sup>-2</sup>    | 14.7 μg h <sup>-1</sup> mg <sub>cat.</sub> <sup>-1</sup>  | 27        |
| Zn-N <sub>2</sub> | nano-Cu                           | 0.0101 mW cm <sup>-2</sup>  | 0.125 μg h <sup>-1</sup> cm <sup>-2</sup>                 | 2         |
| Zn-N <sub>2</sub> | NbS <sub>2</sub> nanosheets       | 0.31 mW cm <sup>-2</sup>    | /                                                         | 28        |
| Zn-N <sub>2</sub> | VN@NSC-900                        | 0.01642 mW cm <sup>-2</sup> | 0.172 μg h <sup>-1</sup> cm <sup>-2</sup>                 | 3         |
| Zn-N <sub>2</sub> | Fe <sub>1.0</sub> HTNs            | 0.02765 mW cm <sup>-2</sup> | 0.137 μg h <sup>-1</sup> cm <sup>-2</sup>                 | 29        |
| Zn-N <sub>2</sub> | Vs-FePS <sub>3</sub> NSs          | 2.6 mW cm <sup>-2</sup>     | /                                                         | 30        |

## References

- 1 J. T. Ren, L. Chen, Y. Liu and Z. Y. Yuan, Hollow cobalt phosphate microspheres for sustainable electrochemical ammonia production through rechargeable Zn-N<sub>2</sub> batteries, *J. Mater. Chem. A*, 2021, **9**, 11370–11380.
- 2 C. Du, Y. Gao, J. Wang and W. Chen, Achieving 59% faradaic efficiency of the N<sub>2</sub> electroreduction reaction in an aqueous Zn-N<sub>2</sub> battery by facilely regulating the surface mass transport on metallic copper, *Chem. Commun.*, 2019, **55**, 12801–12804.
- 3 X. W. Lv, Y. Liu, Y. S. Wang, X. L. Liu and Z. Y. Yuan, Encapsulating vanadium nitride nanodots into N,S-codoped graphitized carbon for synergistic electrocatalytic nitrogen reduction and aqueous Zn-N<sub>2</sub> battery, *Appl. Catal. B: Environ.*, 2021, **280**, 119434.
- 4 T. Xu, D. Ma, T. Li, L. Yue, Y. Luo, S. Lu, X. Shi, A. M. Asiri, C. Yang and X. Sun, Enhanced electrocatalytic N<sub>2</sub>-to-NH<sub>3</sub> fixation by ZrS<sub>2</sub> nanofibers with a sulfur vacancy, *Chem. Commun.*, 2020, **56**, 14031–14034.
- 5 D. Liu, X. Li, S. Chen, H. Yan, C. Wang, C. Wu, Y. A. Haleem, S. Duan, J. Lu, B. Ge, P. M. Ajayan, Y. Luo, J. Jiang and L. Song, Atomically dispersed platinum supported on curved carbon supports for efficient electrocatalytic hydrogen evolution, *Nat. Energy*, 2019, **4**, 512–518.
- 6 Y. Yang, L. Zhang, Z. Hu, Y. Zheng, C. Tang, P. Chen, R. Wang, K. Qiu, J. Mao, T. Ling and S. Z. Qiao, The crucial role of charge accumulation and spin



- polarization in activating carbon-based catalysts for electrocatalytic nitrogen reduction, *Angew. Chem. Int. Ed.*, 2020, **59**, 4525–4531.
- 7 H. Fei, T. Guo, Y. Xin, L. Wang, R. Liu, D. Wang, F. Liu and Z. Wu, Sulfur vacancy engineering of MoS<sub>2</sub> via phosphorus incorporation for improved electrocatalytic N<sub>2</sub> reduction to NH<sub>3</sub>, *Appl. Catal. B: Environ.*, 2022, **300**, 120733.
- 8 W. Xu, G. Fan, J. Chen, J. Li, L. Zhang, S. Zhu, X. Su, F. Cheng and J. Chen, Nanoporous palladium hydride for electrocatalytic N<sub>2</sub> reduction under ambient conditions, *Angew. Chem. Int. Ed.*, 2020, **59**, 3511–3516.
- 9 H. Chen, J. Liang, L. Li, B. Zheng, Z. Feng, Z. Xu, Y. Luo, Q. Liu, X. Shi, Y. Liu, S. Gao, A. M. Asiri, Y. Wang, Q. Kong and X. Sun, Ti<sub>2</sub>O<sub>3</sub> nanoparticles with Ti<sup>3+</sup> sites toward efficient NH<sub>3</sub> electrosynthesis under ambient conditions, *ACS Appl. Mater. Interfaces*, 2021, **13**, 41715–41722.
- 10 Z. Han, C. Choi, S. Hong, T.-S. Wu, Y.-L. Soo, Y. Jung, J. Qiu and Z. Sun, Activated TiO<sub>2</sub> with tuned vacancy for efficient electrochemical nitrogen reduction, *Appl. Catal. B: Environ.*, 2019, **257**, 117896.
- 11 C. Fang, T. Bi, X. Xu, N. Yu, Z. Cui, R. Jiang and B. Geng, Oxygen vacancy-enhanced electrocatalytic performances of TiO<sub>2</sub> nanosheets toward N<sub>2</sub> reduction reaction, *Adv. Mater. Interfaces*, 2019, **6**, 1901034.
- 12 S. Cheng, Y. J. Gao, Y. L. Yan, X. Gao, S. H. Zhang, G. L. Zhuang, S. W. Deng, Z. Z. Wei, X. Zhong and J. G. Wang, Oxygen vacancy enhancing mechanism of nitrogen reduction reaction property in Ru/TiO<sub>2</sub>, *J. Energy Chem.*, 2019, **39**,

144–151.

- 13 S. Zhang, W. Wang, Y. Gao, S. Deng, L. Ding, H. Zhuo, Z. Bao, W. Ji, C. Qiu and J. Wang, Pd-Co alloy supported on TiO<sub>2</sub> with oxygen vacancies for efficient N<sub>2</sub> and O<sub>2</sub> electrocatalytic reduction, *Appl. Surf. Sci.*, 2021, **567**, 150680.
- 14 X. Li, Y. Cao, T. Xu, Y. Luo, T. Li, H. Zhao, S. Lu, X. Shi, A. M. Asiri, J. Hu, Q. Liu and X. Sun, Ag@TiO<sub>2</sub> as an efficient electrocatalyst for N<sub>2</sub> fixation to NH<sub>3</sub> under ambient conditions, *ChemistrySelect*, 2021, **6**, 5271–5274.
- 15 Y. Wang, K. Jia, Q. Pan, Y. Xu, Q. Liu, G. Cui, X. Guo and X. Sun, Boron-doped TiO<sub>2</sub> for efficient electrocatalytic N<sub>2</sub> fixation to NH<sub>3</sub> at ambient conditions, *ACS Sustainable Chem. Eng.*, 2019, **7**, 117–122.
- 16 H. Chen, T. Wu, X. Li, S. Lu, F. Zhang, Y. Wang, H. Zhao, Q. Liu, Y. Luo, A. M. Asiri, Z. Feng, Y. Zhang and X. Sun, Modulating oxygen vacancies of TiO<sub>2</sub> nanospheres by Mn-doping to boost electrocatalytic N<sub>2</sub> reduction, *ACS Sustainable Chem. Eng.*, 2021, **9**, 1512–1517.
- 17 H. J. Chen, G. R. Deng, Z. S. Feng, Z. Q. Xu, M. Y. Yang, Y. Huang, Q. Peng, T. Li and Y. Wang, Enhanced electrocatalytic performance of TiO<sub>2</sub> nanoparticles by Pd doping toward ammonia synthesis under ambient conditions, *Chem. Commun.*, 2022, **58**, 3214–3217.
- 18 H. Chen, J. Liang, K. Dong, L. Yue, T. Li, Y. Luo, Z. Feng, N. Li, M. S. Hamdy, A. A. Alshehri, Y. Wang, X. Sun and Q. Liu, Ambient electrochemical N<sub>2</sub>-to-NH<sub>3</sub> conversion catalyzed by TiO<sub>2</sub> decorated juncus effusus-derived carbon

- microtubes, *Inorg. Chem. Front.*, 2022, **9**, 1514–1519.
- 19 T. Wu, W. Kong, Y. Zhang, Z. Xing, J. Zhao, T. Wang, X. Shi, Y. Luo and X. Sun, Greatly enhanced electrocatalytic N<sub>2</sub> reduction on TiO<sub>2</sub> via V doping, *Small Methods*, 2019, **3**, 1900356.
- 20 R. Zhang, X. Ren, X. Shi, F. Xie, B. Zheng, X. Guo and X. Sun, Enabling effective electrocatalytic N<sub>2</sub> conversion to NH<sub>3</sub> by the TiO<sub>2</sub> nanosheets array under ambient conditions, *ACS Appl. Mater. Interfaces*, 2018, **10**, 28251–28255.
- 21 B. Li, X. Zhu, J. Wang, R. Xing, Q. Liu, X. Shi, Y. Luo, S. Liu, X. Niu and X. Sun, Ti<sup>3+</sup> self-doped TiO<sub>2-x</sub> nanowires for efficient electrocatalytic N<sub>2</sub> reduction to NH<sub>3</sub>, *Chem. Commun.*, 2020, **56**, 1074–1077.
- 22 L. Yang, T. Wu, R. Zhang, H. Zhou, L. Xia, X. Shi, H. Zheng, Y. Zhang and X. Sun, Insights into defective TiO<sub>2</sub> in electrocatalytic N<sub>2</sub> reduction: combining theoretical and experimental studies, *Nanoscale*, 2019, **11**, 1555–1562.
- 23 Q. Qin, Y. Zhao, M. Schmallegger, T. Heil, J. Schmidt, R. Walczak, G. Gescheidt-Demner, H. Jiao and M. Oschatz, Enhanced electrocatalytic N<sub>2</sub> reduction via partial anion substitution in titanium oxide-carbon composites, *Angew. Chem. Int. Ed.*, 2019, **58**, 13101–13106.
- 24 G. Yu, H. Guo, W. Kong, T. Wang, Y. Luo, X. Shi, A. M. Asiri, T. Li and X. Sun, Electrospun TiC/C nanofibers for ambient electrocatalytic N<sub>2</sub> reduction, *J. Mater. Chem. A*, 2019, **7**, 19657–19661.
- 25 N. Cao, Z. Chen, K. Zang, J. Xu, J. Zhong, J. Luo, X. Xu and G. Zheng, Doping

- strain induced bi-Ti<sup>3+</sup> pairs for efficient N<sub>2</sub> activation and electrocatalytic fixation, *Nat. Commun.*, 2019, **10**, 2877.
- 26 L. Li, H. Chen, L. Li, B. Li, Q. Wu, C. Cui, B. Deng, Y. Luo, Q. Liu, T. Li, F. Zhang, A. M. Asiri, Z. S. Feng, Y. Wang and X. Sun, La-doped TiO<sub>2</sub> nanorods toward boosted electrocatalytic N<sub>2</sub>-to-NH<sub>3</sub> conversion at ambient conditions, *Chin. J. Catal.*, 2021, **42**, 1755–1762.
- 27 J. T. Ren, L. Chen, H. Y. Wang and Z. Y. Yuan, Aqueous rechargeable Zn-N<sub>2</sub> battery assembled by bifunctional cobalt phosphate nanocrystals-loaded carbon nanosheets for simultaneous NH<sub>3</sub> production and power generation, *ACS Appl. Mater. Interfaces*, 2021, **13**, 12106–12117.
- 28 H. Wang, J. Si, T. Zhang, Y. Li, B. Yang, Z. Li, J. Chen, Z. Wen, C. Yuan, L. Lei and Y. Hou, Exfoliated metallic niobium disulfate nanosheets for enhanced electrochemical ammonia synthesis and Zn-N<sub>2</sub> battery, *Appl. Catal. B: Environ.*, 2020, **270**, 118892.
- 29 X. W. Lv, X. L. Liu, L. J. Gao, Y. P. Liu and Z. Y. Yuan, Iron-doped titanium dioxide hollow nanospheres for efficient nitrogen fixation and Zn-N<sub>2</sub> aqueous batteries, *J. Mater. Chem. A*, 2021, **9**, 4026–4035.
- 30 H. Wang, Z. Li, Y. Li, B. Yang, J. Chen, L. Lei, S. Wang and Y. Hou, An exfoliated iron phosphorus trisulfide nanosheet with rich sulfur vacancy for efficient dinitrogen fixation and Zn-N<sub>2</sub> battery, *Nano Energy*, 2021, **81**, 105613.
